# Supplementary material
Source: Springer Nature journal article supplement (https://www.springermedizin.de/resource/supplementary/12991_2009_998_MOESM1_ESM.pdf/9615540)

**DISORGANIZATION**

**NEGATIVE SYMPTOMS**  
(i.e. objective SANS “anhedonia” sub-scale)

Objective  
behavioural  
field

coexistence

Subjective  
field

**SUBJECTIVE ANHEDONIA**  
(i.e. PAS and SAS total score)

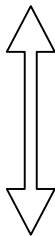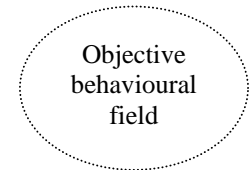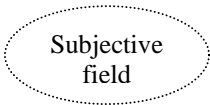

Supplement: MOESM1 [file 9615540]
